# Supplementary material
Source: PubMed Central journal article supplement (PMC2423295)
Supplement: supp_28_11_3830__2.pdf [file supp_28_11_3830__2.pdf]

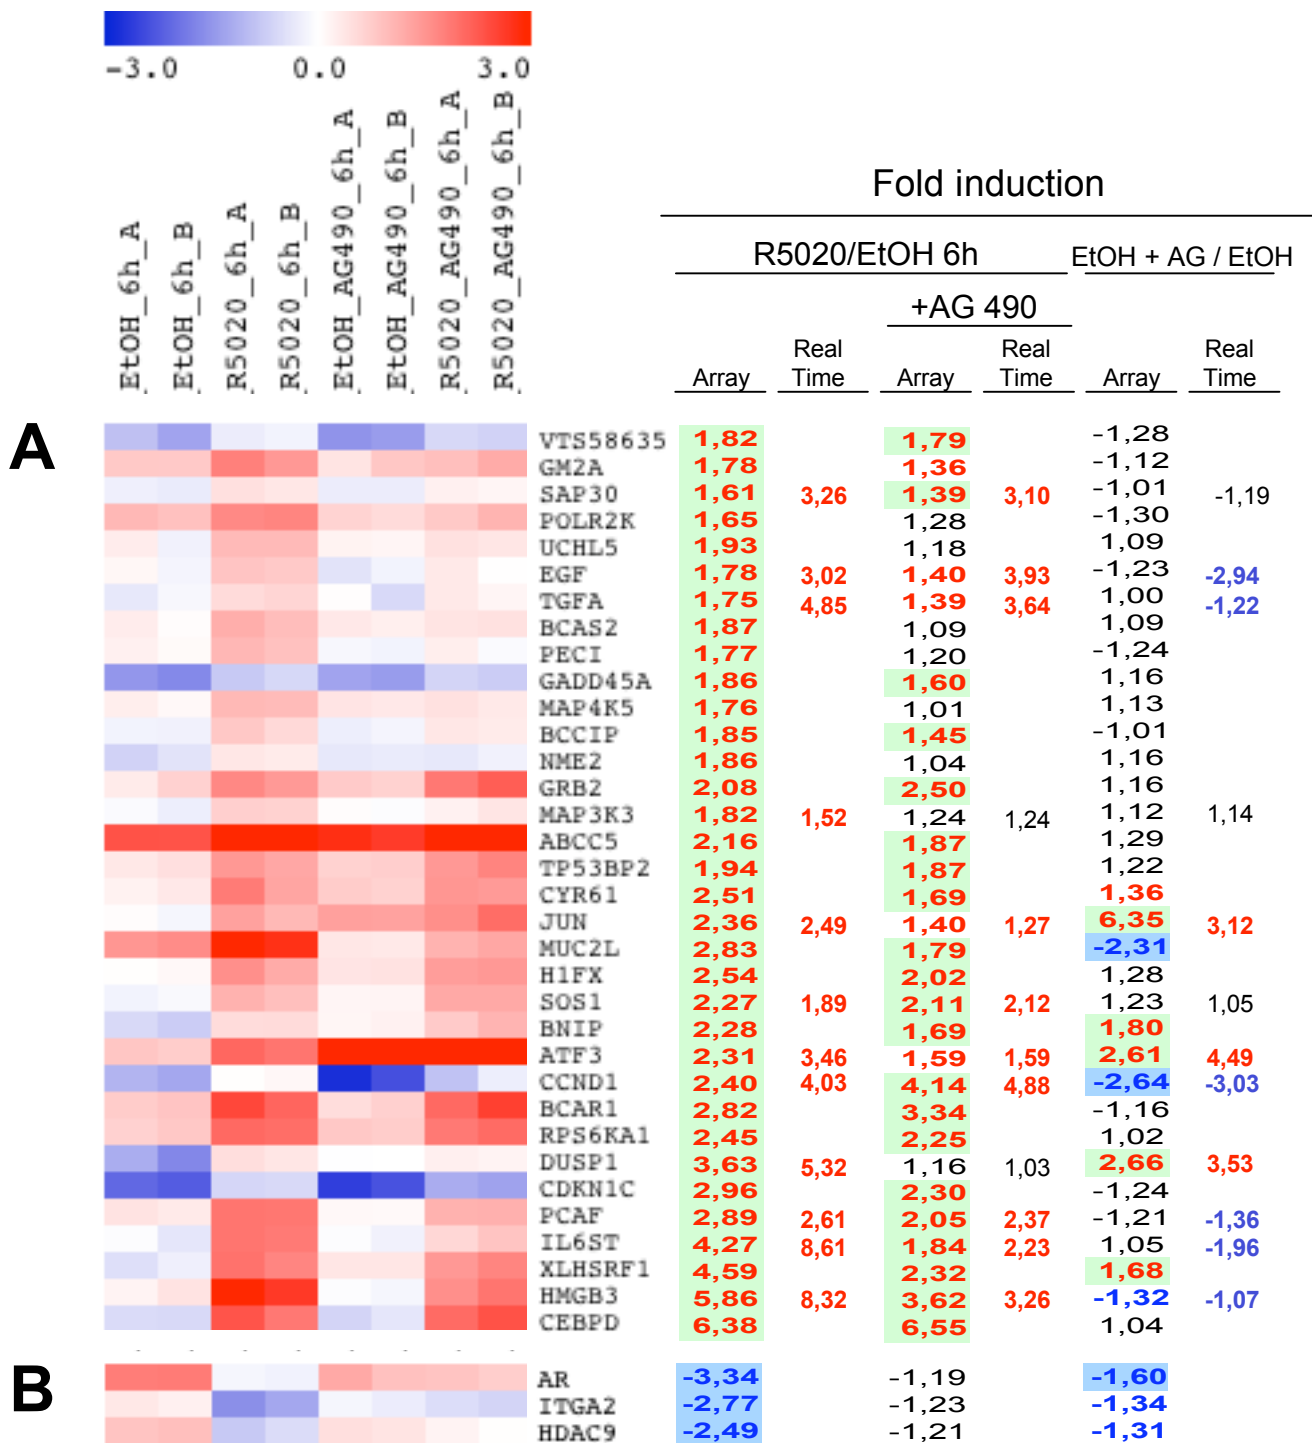

**Fig. S1**

Table S1. Nomenclature of genes responding to progestin shown in Figure S1.

| Symbol           | GenBankNo. | Name                                                           |
|------------------|------------|----------------------------------------------------------------|
| ABCC5            | NM_005688  | ATP-binding cassette, sub-family C (CFTR/MRP), member 5        |
| ATF3             | NM_004024  | Activating transcription factor 3                              |
| BCAR1            | NM_014567  | Breast cancer anti-estrogen resistance 1                       |
| BCAS2            | NM_005872  | Breast carcinoma amplified sequence 2                          |
| BCCIP            | NM_078469  | BRCA2 and CDKN1A interacting protein                           |
| BNIP             | NM_004052  | BCL2/adenovirus E1B 19kDa interacting protein 3                |
| CCND1            | NM_053056  | Cyclin D1                                                      |
| CDKN1C           | NM_000076  | Cyclin-dependent kinase inhibitor 1C (p57, Kip2)               |
| CEBPD            | BM924801   | CCAAT/enhancer binding protein (C/EBP), delta                  |
| CYR61            | Y11307     | Cysteine-rich, angiogenic inducer, 61                          |
| DUSP1            | NM_004417  | Dual specificity phosphatase 1                                 |
| EGF              | NM_001963  | Epidermal growth factor (beta-urogastrone)                     |
| GADD45A          | NM_001924  | Growth arrest and DNA-damage-inducible, alpha                  |
| GM2A             | NM_000405  | GM2 ganglioside activator                                      |
| GRB2             | NM_002086  | Growth factor receptor-bound protein 2                         |
| H1FX             | NM_006026  | H1 histone family, member X                                    |
| HMGB3            | NM_005342  | High-mobility group box 3                                      |
| IL6ST            | NM_002184  | Interleukin 6 signal transducer (gp130, oncostatin M receptor) |
| JUN              | NM_002228  | V-jun sarcoma virus 17 oncogene homolog (avian)                |
| MAP3K3           | NM_002401  | Mitogen-activated protein kinase kinase kinase 3               |
| MAP4K5           | NM_006575  | Mitogen-activated protein kinase kinase kinase kinase 5        |
| MUC2L=GRHL2      | BG675392   | Grainyhead-like 2 (Drosophila)                                 |
| NME2             | NM_002512  | Non-metastatic cells 1, protein (NM23A)                        |
| PCAF             | NM_003884  | P300/CBP-associated factor                                     |
| PECI             | NM_006117  | Peroxisomal D3,D2-enoyl-CoA isomerase                          |
| POLR2K           | NM_005034  | Polymerase (RNA) II (DNA directed) polypeptide K, 7.0kDa       |
| RPS6KA1          | NM_002953  | Ribosomal protein S6 kinase, 90kDa, polypeptide 1              |
| SAP30            | NM_003864  | Sin3A-associated protein, 30kDa                                |
| SOS1             | NM_005633  | Son of sevenless homolog 1 (Drosophila)                        |
| TGFA             | NM_003236  | Transforming growth factor, alpha                              |
| TP53BP2          | NM_005426  | Tumor protein p53 binding protein, 2                           |
| UCHL5            | NM_015984  | Ubiquitin carboxyl-terminal hydrolase L5                       |
| VTSS8635=RASL10B | NM_033315  | RAS-like, family 10, member B                                  |
| XLHSTRF1=DNAH1   | AB037831   | Dynein, axonemal, heavy polypeptide 1                          |
| AR               | NM_000044  | Androgen receptor                                              |
| HDAC9            | NM_178423  | Histone deacetylase 9                                          |
| ITGA2            | NM_002203  | Integrin, alpha 2 (CD49B, alpha 2 subunit of VLA-2 receptor)   |
